# Supplementary material for: Urinary Potassium Excretion, Fibroblast Growth Factor 23, and Incident Hypertension in the General Population-Based PREVEND Cohort
Source: MDPI journal article supplement (doi:10.3390/nu13124532), 2021-12-17
Supplement: s1 [file s1]

## Supplemental material

**Supplemental Table S1.** Baseline characteristics according to sex specific tertiles of fibroblast growth factor 23 in 4,178 participants of PREVEND

|                                                 | Sex-specific tertiles of total fibroblast growth factor 23, RU/mL |                    |                    | <i>p</i> -trend* |
|-------------------------------------------------|-------------------------------------------------------------------|--------------------|--------------------|------------------|
|                                                 | I                                                                 | II                 | III                |                  |
| Men                                             | <58                                                               | 58–73              | ≥73                |                  |
| Women                                           | <61                                                               | 61–82              | ≥82                |                  |
| Fibroblast growth factor 23, (RU/mL)            | 49 (44 – 53)                                                      | 61 (58 – 64)       | 74 (70 – 79)       | -                |
| Men, n (%)                                      | 648 (46)                                                          | 649 (46)           | 646 (46)           | -                |
| Age, (yr.)                                      | 48 (10)                                                           | 50 (10)            | 50 ± 11            | <0.001           |
| BMI, (kg/m <sup>2</sup> )                       | 24.9 (23.0 – 27.4)                                                | 25.3 (23.1 – 27.9) | 25.6 (23.2 – 28.4) | <0.001           |
| Systolic blood pressure, (mmHg)                 | 117 (109 – 126)                                                   | 117 (109 – 126)    | 118 (110 – 127)    | 0.07             |
| Diastolic blood pressure, (mmHg)                | 70 (65 – 76)                                                      | 70 (65 – 75)       | 70 (66 – 76)       | 0.14             |
| Lipid lowering drugs, n (%)                     | 32 (3)                                                            | 41 (3)             | 56 (5)             | 0.05             |
| Antidiabetic drugs, n (%)                       | 13 (1)                                                            | 21 (2)             | 20 (2)             | 0.42             |
| Smoking status                                  |                                                                   |                    |                    | <0.001           |
| Never, n (%)                                    | 495 (36)                                                          | 420 (30)           | 375 (27)           |                  |
| Current or former, n (%)                        | 897 (64)                                                          | 976 (70)           | 1015 (73)          |                  |
| Alcohol consumption, yes (%)                    | 1114 (80)                                                         | 1084 (78)          | 1036 (74)          | 0.003            |
| Cardiovascular disease, yes (%)                 | 57 (6)                                                            | 71 (8)             | 55 (6)             | 0.20             |
| Diabetes, yes (%)                               | 30 (2)                                                            | 42 (3)             | 46 (3)             | 0.17             |
| eGFR (CKD-epi), (mL/min·1.73m <sup>2</sup> )    | 99 (13)                                                           | 96 (13)            | 95 (14)            | <0.001           |
| Plasma albumin, (g/L)                           | 44 (6)                                                            | 44 (5)             | 44 (4)             | 0.38             |
| Plasma potassium, (mmol/L)                      | 4.2 (0.2)                                                         | 4.2 (0.3)          | 4.2 (0.3)          | 0.002            |
| Plasma sodium, (mmol/L)                         | 141 (2)                                                           | 141 (2)            | 141 (2)            | 0.12             |
| High sensitive CRP, (mg/L)                      | 1.0 (0.5 – 2.4)                                                   | 1.1 (0.5 – 2.4)    | 1.2 (0.5 – 2.7)    | 0.05             |
| Plasma phosphate, (mmol/L)                      | 1.00 (0.33)                                                       | 1.03 (0.34)        | 1.05 (0.46)        | 0.005            |
| Plasma PTH, (pmol/L)                            | 4.7 (3.9 – 5.5)                                                   | 4.7 (4.0 – 5.7)    | 4.8 (4.0 – 5.8)    | 0.006            |
| Plasma vitamin D <sub>3</sub> , 25-OH, (nmol/L) | 58.7 (41.2 – 77.3)                                                | 58.7 (42.6 – 78.0) | 54.2 (37.9 – 74.4) | <0.001           |
| Plasma calcium, (mmol/L)                        | 2.28 (0.11)                                                       | 2.30 (0.11)        | 2.30 (0.12)        | <0.001           |
| Plasma calcium corrected, (mmol/L)              | 2.20 (0.16)                                                       | 2.22 (0.14)        | 2.22 (0.16)        | 0.001            |
| Iron, (umol/L)                                  | 17 (6)                                                            | 17 (6)             | 15 (6)             | <0.001           |
| Ferritin, (ug/L)                                | 92 (50 – 159)                                                     | 88 (45 – 156)      | 64 (25 – 131)      | <0.001           |
| Transferrin saturation, (%)                     | 26 (9)                                                            | 26 (9)             | 22 (10)            | <0.001           |
| Urinary sodium excretion, (mmol/24hrs)          | 141 (109 – 174)                                                   | 138 (104 – 174)    | 136 (104 – 172)    | 0.07             |
| Urinary potassium excretion, (mmol/24hrs)       | 70 (23)                                                           | 70 (22)            | 68 (22)            | 0.006            |
| Urinary phosphate excretion, (mmol/24hrs)       | 25 (19 – 32)                                                      | 26 (20 – 33)       | 25 (19 – 32)       | 0.27             |
| TMP/GFR                                         | 0.97 (0.80 – 1.19)                                                | 1.01 (0.82 – 1.23) | 1.03 (0.83 – 1.23) | 0.002            |
| Urinary creatinine excretion, (mmol/24hrs)      | 13 (3)                                                            | 12 (3)             | 12 (3)             | 0.10             |

|                                                   |                    |                    |                    |      |
|---------------------------------------------------|--------------------|--------------------|--------------------|------|
| Urinary albumin excretion, (mg/24hrs)             | 11.6 (8.8 – 18.3)  | 11.3 (8.5 – 17.1)  | 11.8 (8.7 – 19.3)  | 0.06 |
| Urinary albumin-to creatinine ratio,<br>(mg/mmol) | 0.64 (0.48 – 1.03) | 0.63 (0.47 – 0.98) | 0.67 (0.48 – 1.08) | 0.05 |

Data are presented as n (%), mean (SD), or median [interquartile range] for nominal, normally distributed, and non-normally distributed data, respectively.

\*The *P*-value represents the *p* for trend in Chi-square test, one-way-ANOVA, or Kruskal Wallis test for nominal, normally distributed and non-homogeneity or non-normally distributed data, respectively.

Abbreviations: BMI, Body Mass Index; eGFR (CKD-epi), estimated glomerular filtration rate based on Chronic Kidney Disease Epidemiology Collaboration equation; CRP, C-reactive protein; PTH, parathyroid hormone; TMP/GFR, renal tubular reabsorption of phosphate.

**Supplemental Table S2.** Multivariable associations of urinary potassium excretion and fibroblast growth factor 23 with systolic and diastolic blood pressure in 4,194 participants of the PREVENT cohort

|                                          | Systolic blood pressure |                 | Diastolic blood pressure |                 |
|------------------------------------------|-------------------------|-----------------|--------------------------|-----------------|
|                                          | Standardized Beta       | <i>P</i> -value | Standardized Beta        | <i>P</i> -value |
| Urinary potassium excretion, mmol/24hrs* | 0.02                    | 0.24            | −0.02                    | 0.16            |
| (Log <sub>2</sub> )FGF23, RU/mL*         | 0.005                   | 0.35            | 0.001                    | 0.93            |

\* Models were multivariable adjusted for age, BMI, eGFR, urinary sodium excretion, urinary albumin-to-creatinine ratio, smoking status, alcohol intake, diabetes and cardiovascular disease. Abbreviations: BMI, Body Mass Index; eGFR, estimated glomerular filtration rate; FGF23; Fibroblast growth factor 23.
